# Supplementary material
Source: PubMed Central journal article supplement (PMC1988957)

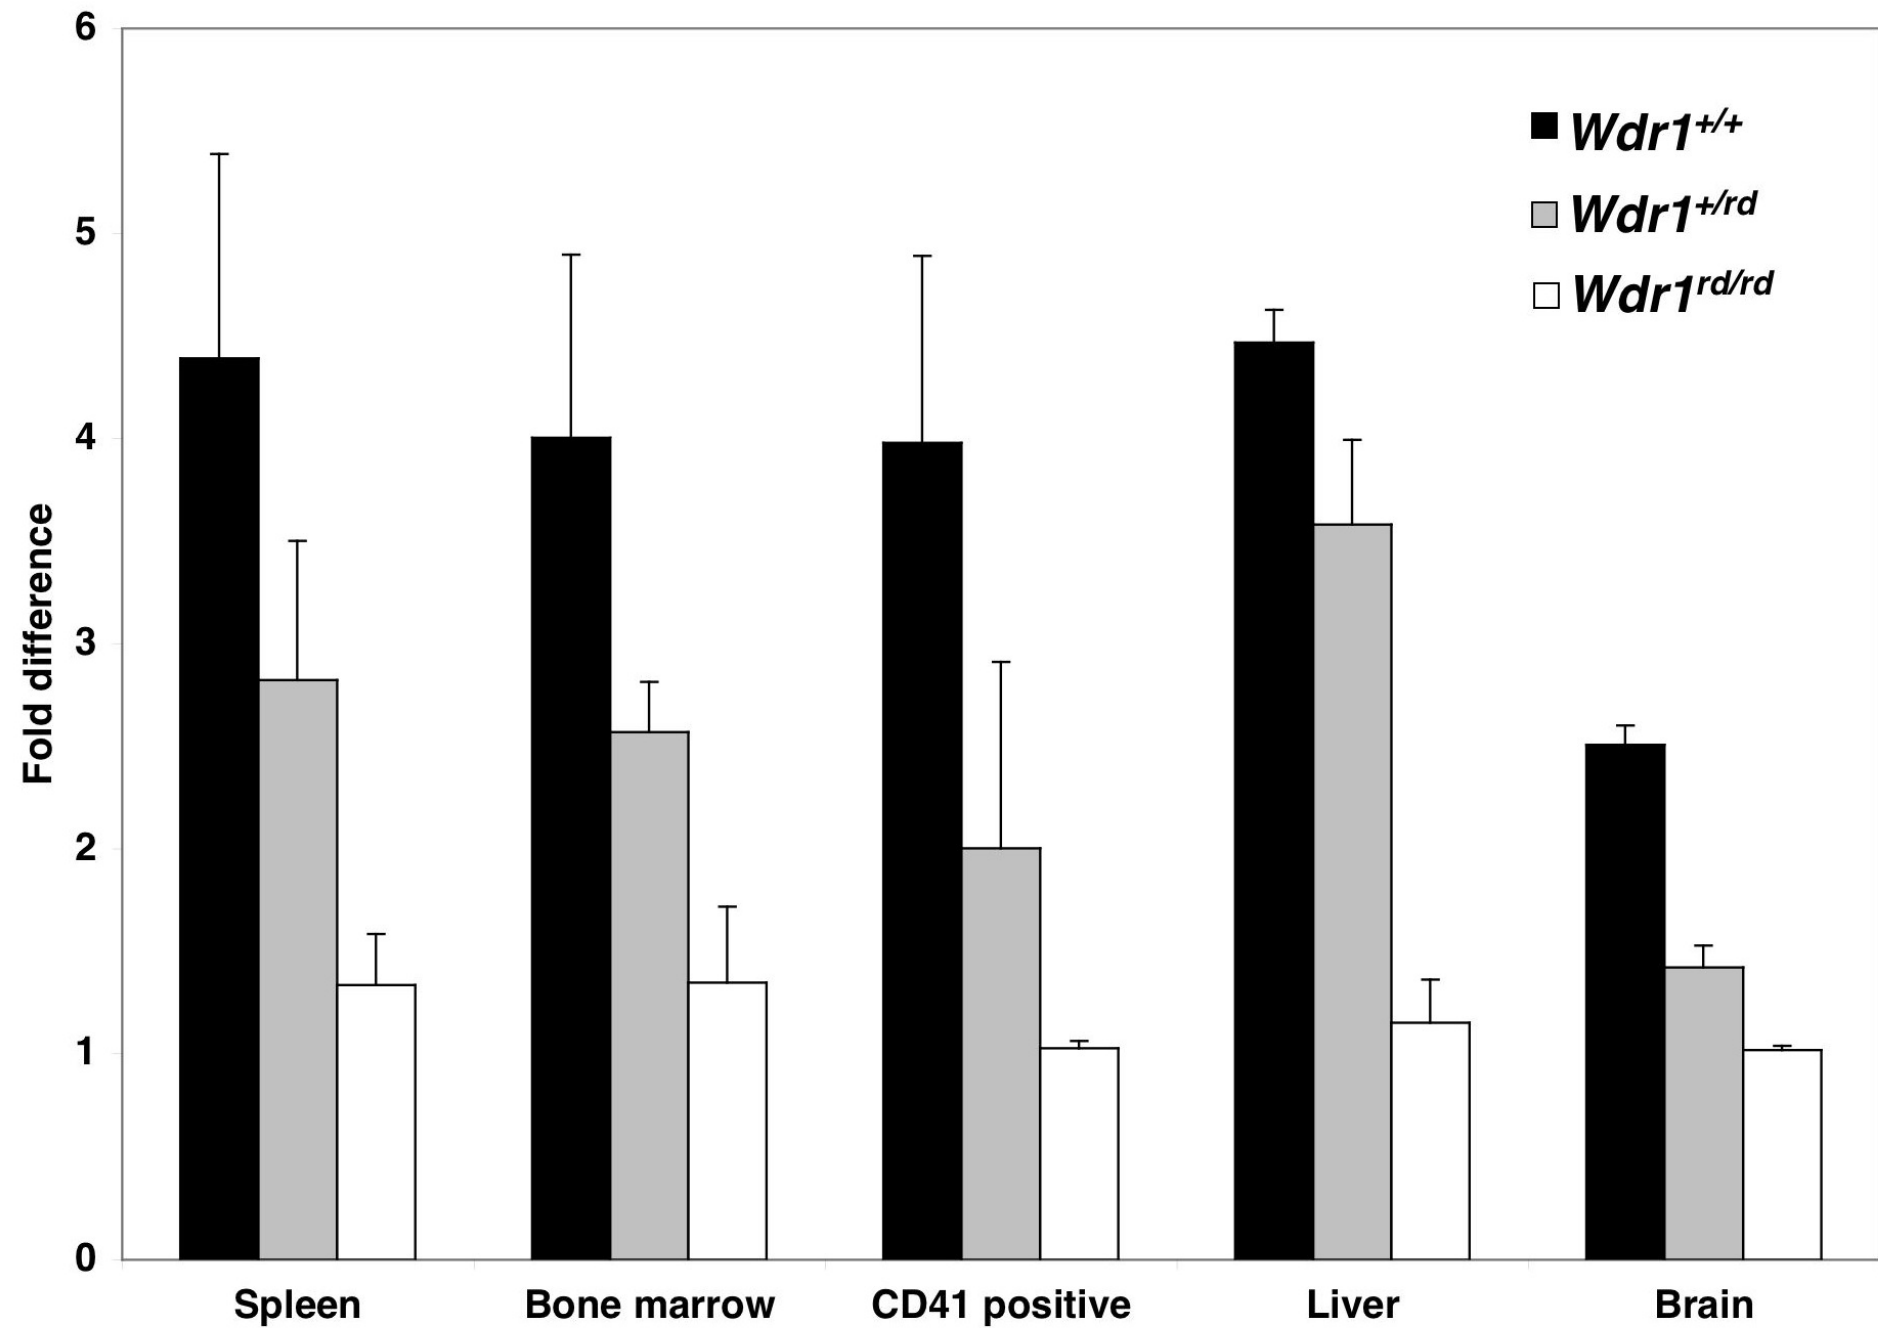

Supplement: blood_blood-2006-10-055087_1.pdf [file blood_blood-2006-10-055087_1.pdf]

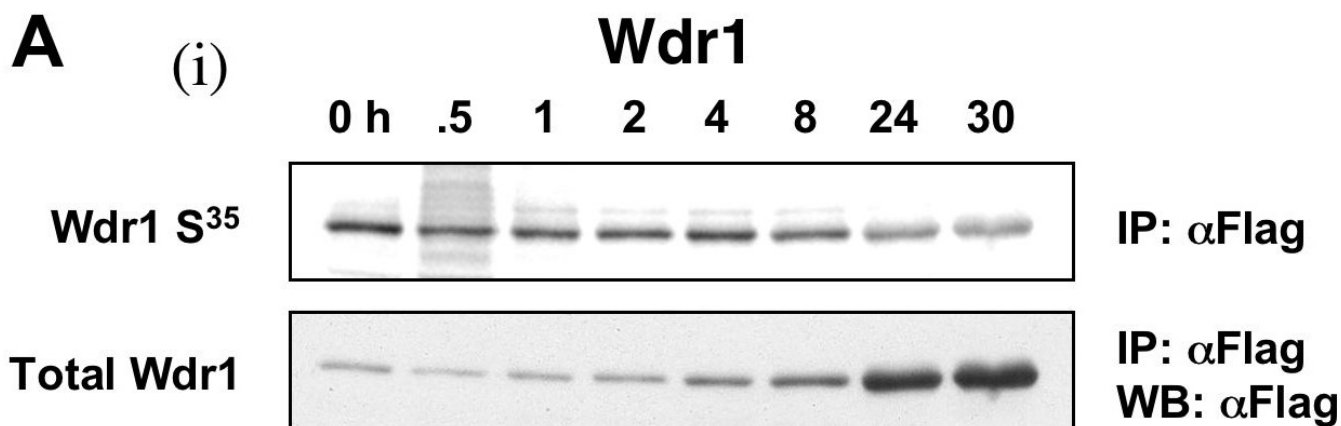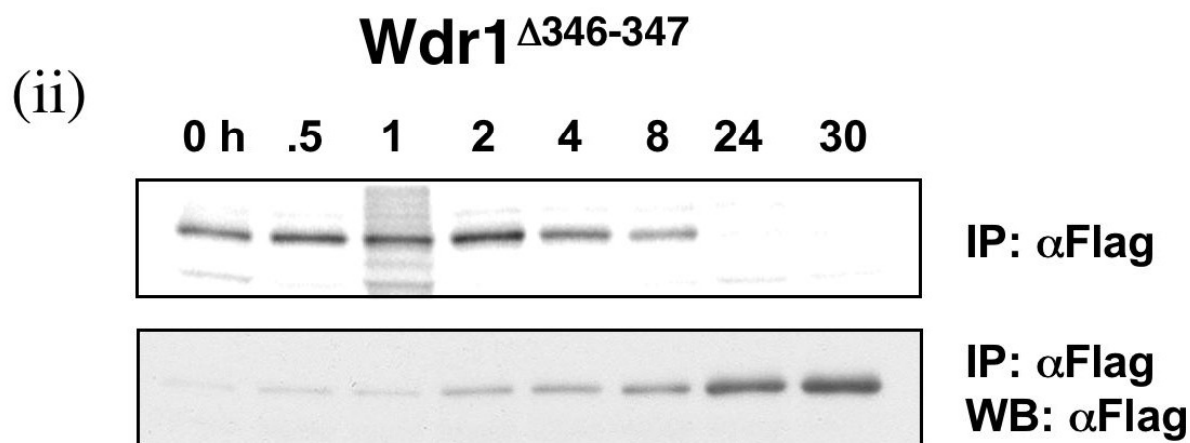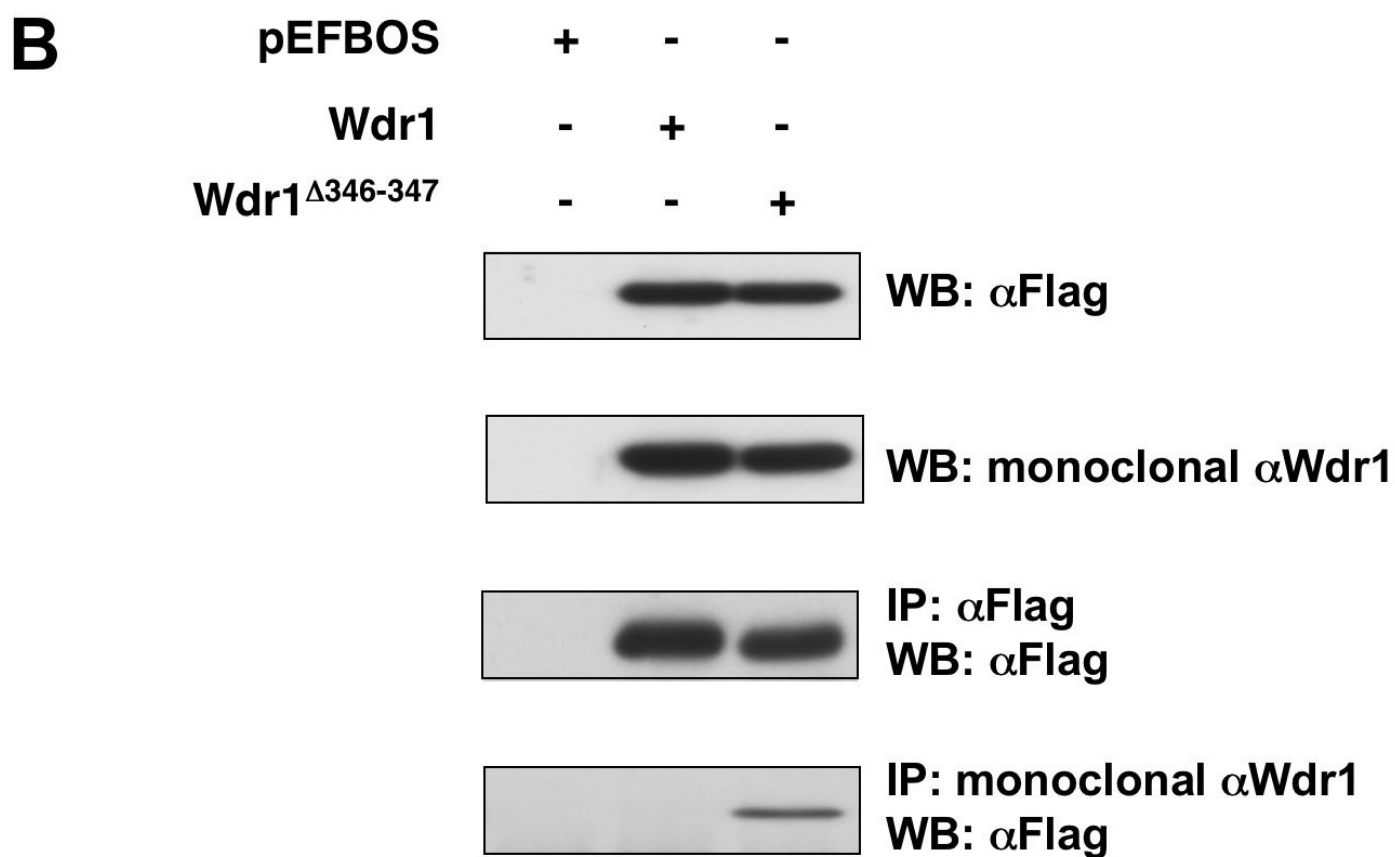

Supplement: blood_blood-2006-10-055087_2.pdf [file blood_blood-2006-10-055087_2.pdf]

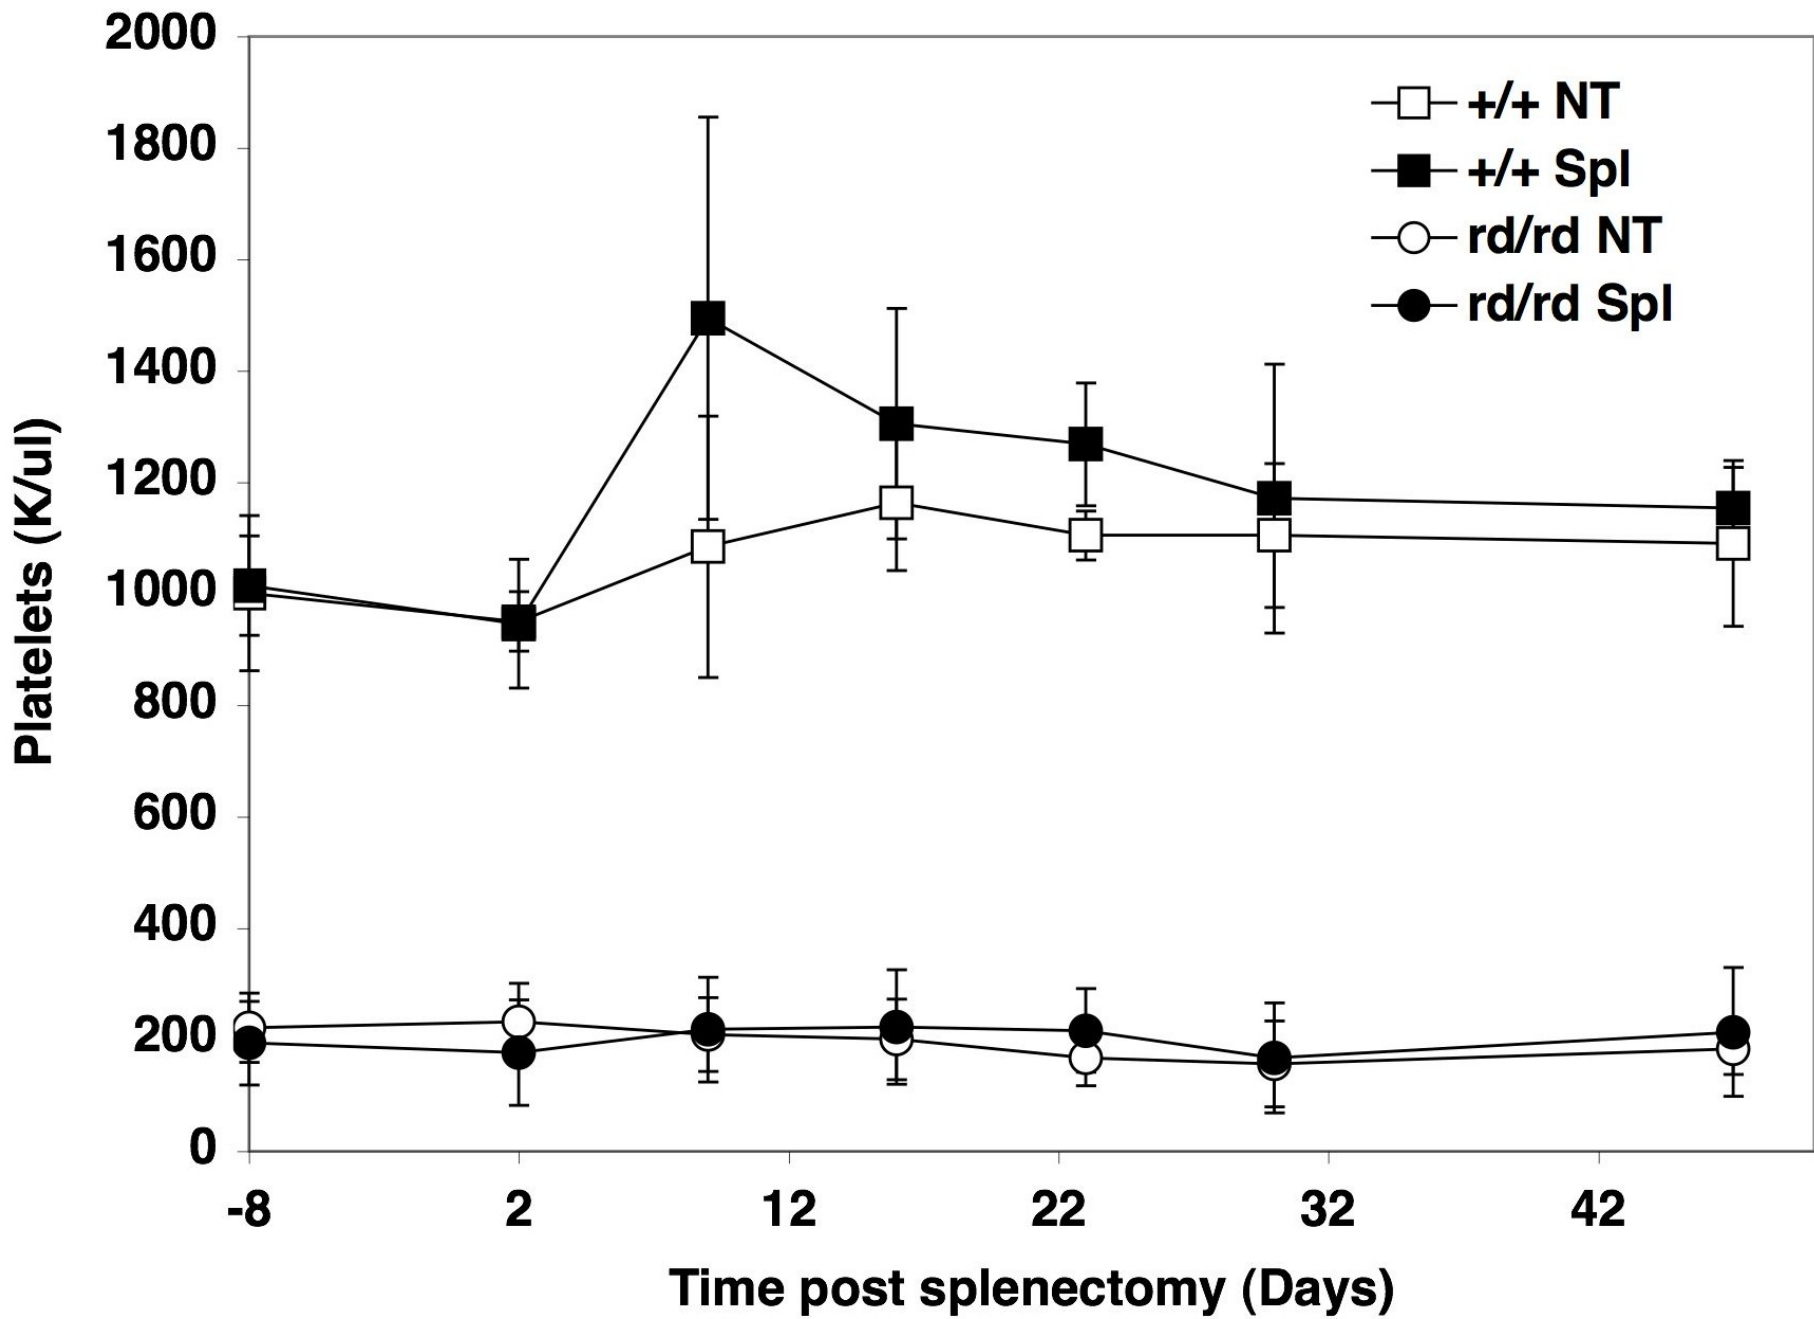

Supplement: blood_blood-2006-10-055087_5.pdf [file blood_blood-2006-10-055087_5.pdf]
